# Supplementary material for: Some Criteria of the Knowledge Representation Method for an Intelligent Problem Solver in STEM Education
Source: Hindawi journal article supplement (doi:10.1155/2020/9834218), 2020-05-13
Supplement: f1 [file 9834218.f1.docx]

## Appendix A: *Intelligent Problem Solver in Vector Algebra*

Based on the knowledge of Vector Algebra in [1], this knowledge domain can be represented by the Rela-Ops model. Although a part of this knowledge domain has been built in [2], this knowledge base is more sufficiently and more accuracy by using the Rela-Ops model. It can represent relations between concepts. It can solve exercises about both relations and operators.

(, , ps, ules)

### –set of concepts

### Set consists of concepts such as “Point”, “Vector”, “Segment”, “Triangle”, “Quadrangle”.

Eg. 1: C(0) = {R, POINT, LINE} where R is a set of real numbers.

C(1) = {SEGMENT, VECTOR}

Concept VECTOR ∈ C(1) has structure:

*Attrs* = {A, B, module}, which:

A, B: POINT

module: R

*EqObj* = {module = Segment(A,B)}
 *RulObj* = { }

C(2) = {ANGLE, TRIANGLE and types of it, QUADRANGLE and types of it, CIRCLE, …}

Concept RECTANGLE ∈ C(2) consists of:

*Attrs* = {A, B, C, D, a, b, c, d, S, p, ...}

A, B, C, D: POINT  a, b: SEGMENT

S, p:

*EqObj =* {Angle(A) + Angle(B) + Angle(C) + Angle(D) = 360, AC = BD,

… }

*RulObj* = { { a = b} → {ABCD: SQUARE} }

### –set of relations between concepts in

### Set of relations between concepts in such as: “belong”, “perpendicular” (⊥), “parallele” (//), “similar”, “intersec”.

Eg.2: The perpendicular relations between two vectors, two lines, two segments.

The similarity between the two triangles.

### ps –set of operators between concepts:

ps includes these operators as Table 6:

Table 6. Some operators of the knowledge domain about Vector Algebra

| Operator | Meaning | Arguments | Return | Properties |
| --- | --- | --- | --- | --- |
| + | Sum of vectors | Vector × Vector | Vector | commutative  associative  identity |
| * | Product between a real number and a vector | R × Vector | Vector |  |
| . | Inner product of vectors | Vector × Vector | R | Commutative |
| o | Cross product of vectors | Vector × Vector | Vector |  |

### ules –set of rules in Vector Algebra

+ Some deductive rules in ules-set:

R1: {AB: Segment , M: Point, M MIDPOINT AB}

→ { }

R2: {u, v: vector, u ⊥ v} → {u.v = 0}

R3: {a,b,c: vector, c = a o b} → {c ⊥ a, c ⊥ b}

R4: {ABC: triangle, G: Point, G center of ABC}

→ {}

R5: {ABC: triangle, AD: Segment, AD median Triangle(ABC)}

+ Some equivalent rules in ules-set:

R6: *u, v*: vector, *u* ⊥ *v* ⇔ *u*.*v* = 0

R7: *u, v*: vector, *u* // *v* ⇔ ∃*k* ∈R, *k* ≠ 0, *u* = *k*.*v*

+ Some equation rules in ules-set:

R8: A,B: Point,

R9: A,B,C: Point,

R10: *u*: vector, *u*2 = *u.u* = (*u*.module)2

R11: *u, v*: vector, *u .v* = *u*.module**v*.module*cos(*u,v*)

Based on the knowlege base of Vector Algebra in high-school, the IPS in this domain has been built. It can solve common exercises of this course.

Eg.3: Let ABC be a triangle, and AD, BE, CF be medians of triangle ABC.

Prove:

+ Specification of this problem:

O:= {Triangle(ABC), AD, BE, CF: Segment}

F:= {AD median Triangle(ABC), BE median Triangle(ABC), CF median Triangle(ABC)}

G:= {Prove: }

+ Solution of program:

1. AD median Triangle(ABC) →
2. BE median Triangle(ABC) →
3. CF median Triangle(ABC) →

The program was packaged at:

<http://www.mediafire.com/file/27zuc6h2wvbj6rk/Data_availability.rar/file>

## Appendix B: *Intelligent Problem Solver in Direct Current Electrical Circuits*

Based on the knowledge of Direct Current (DC) Electrical Circuits in the physics curriculum at the middle school [3, 4], this knowledge domain can be represented by the Rela-Ops model. This knowledge base is used to construct the IPS system for students in middle school.

(, , ps, ules)

### –set of concepts:

### Set consists of concepts such as “Circuit,” “lamb,” “Resistor,” “VariableResistor,” “Capacitor”

Eg.4: C(0) = {R}

C(1) = {CIRCUIT, LAMB}

Concept CIRCUIT ∈ C(1) has structure:

*Attrs* = {R, V, I, P}, which:

R, V, I, P: values of resistance, potential difference, current flow, power of circuit.

*RulObj* = { }

Concept LAMB ∈ C(1) has structure:

*Attrs* = { • R,V, I, P: values of resistance, potential difference, current flow, power of lamb.

• Vmax, Imax, Pmax: maximum values of potential difference, current flow, power of lamb

• s: is a number performs three levels of light:

s = -1: the light of lamb is low

s = 0: the light of lamb is normal

s = 1: the light of lamb is high }

*RulesObj*= { r1: if (I < Imax) or (P < Pmax) or (V < Vmax) then s = -1,

r2: if (I = Imax) or (P = Pmax) or (V = Vmax) then s = 0,

r3: if (I > Imax) or (P > Pmax) or (V > Vmax) then s = 1}

### –set of relations between concepts in

### Set of relations between concepts in such as: “equivalence”

Eg.5: The “equivalence” relation between two circuits, two resistors.

### ps –set of operators between concepts:

ps includes these operators as Table 7:

Table 7. Some operators of the knowledge domain about DC Electrical Circuits

| Operator | Meaning | Arguments | Return | Properties |
| --- | --- | --- | --- | --- |
| + | Circuits can be connected by series connection | Circuit × Circuit | Circuit | commutative  associative |
| // | Circuits can be connected by parallel connection | Circuit × Circuit | Circuit | commutative  associative |
| o | Capacitors can be connected by series connection | Capacicator × Capacicator | Capacicator | commutative  associative |
| Ξ | Capacitors can be connected by parallel connection | Capacicator × Capacicator | Capacicator | commutative  associative |

### ules–set of rules in DC Electrical Circuits

+ Some deductive rules in ules-set:

R1: *Rule of series circuits*

{D1, D2, AB: CIRCUIT, AB = D1 + D2}

→ {AB.V = D1.V + D2.V, AB.I = D1.I = D2.I, AB.R = D1.R + D2.R}

R2: *Rule of parallel circuits*

{D1, D2, AB: CIRCUIT, AB = D1 // D2}

→ {AB.V = D1.V = D2.V, AB.I = D1.I + D2.I, }

+ Some equation rules in ules -set:

R3: D1 + D2 // D3 = (D1 + D2) // D3

R4: D1 // D2 + D3 = (D1 // D2) + D3

R5: C1 o C2 o C3 = (C1 o C2) o C3

R6: C1 Ξ C2 Ξ C3 = (C1 Ξ C2) Ξ C3

Based on the knowlege base of DC Electrical Circuits in middle-school, the IPS in this domain has been built. It can solve common exercises of this course.


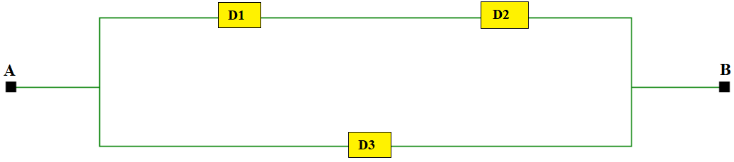
 Eg. 6: Let a circuit including three resistors as the figure: Resistor D1 has value 10Ω, resistor D2 has value 10Ω, resistor D3 has value 20Ω. The potential difference of the circuit current is 24V.

What is the total current though the circuit ?

+ Specification of this problem:

O:= {D1, D2, D3: RESISTOR ; AB: CIRCUIT}

E:= { AB = (D1 + D2) // D3)}

F:= {D1.R=10, D2.R=10, D3.R=20, AB.V = 24}

G:={Compute: AB.I}

+ Solution of Program:

1. Let [EF, CIRCUIT], EF = D1 + D2, AB = (D1 + D2) // D3)

→ AB = EF // D3

1. AB: Circuit → AB.I = AB.V / AB.R
2. AB = EF // D3
3. EF = D1 + D2 → EF.R = D1.R + D2.R
4. From {D1.R = 10, D2.R =10, EF.R = D1.R + D2.R} → EF.R = 20
5. From {D3.R = 20, EF.R = 20, } → AB.R = 10
6. From {AB.R = 10, AB.V = 24, AB.I = AB.V / AB.R} → AB.I = 2.4

The program was packaged at:

<http://www.mediafire.com/file/27zuc6h2wvbj6rk/Data_availability.rar/file>

## Appendix C: *Intelligent system for learning of Data Structure and Algorithms*

In the appendix, a knowledge base of the Data Structure and Algorithms course is presented. The knowledge base is used to design of the intelligent system for learning of the course. This system can solve and illustrate of algorithms and the work of data structures in the course. The designing of this intelligent system has been presented in [5].

Based on the knowledge of Data Structure and Algorithms in [6], this knowledge domain can be represented by an improved model of Rela-Ops model. This improved model is lacked of the ps-set, but it is added more the lgo-set. The lgo-set is the set of algorithms in the course, each algorithm in this set is represented as a frame.

(, , ules, lgo)

### –set of concepts

Set is the set of concepts about Data structures, such as Array, Linked list, Stack, Queue, Tree, Binary Tree, etc.

= {ARRAY, LINKED_LIST*,* BINARY_TREE…}

Eg. 7: The LINKED_LISTconcept has the following structure:

*(Attrs, EqObj, RulObj)*

*Attrs* = {head, tail, element}, in which:

*head*: pointer // the head element of the linked list

*tail*: pointer // the tail element of the linked list

element: INT // value of the element.

*EqObj* = {}

*RulObj* = { r: {head = tail} → {n = 0} }

### –set of relations between concepts in

Set includes relations such as: *is-a* and *has-a*. For example, the binary search tree is a binary tree or stack is a linked list.

= {TREEhas-a ROOT_NODE, BINARY_SEARCH_TREE is-a BINARY_TREE,

STACK is-a LINKED_LIST, QUEUE is-a LINKED_LIST, …}

### ules –set of rules in Data Structure and Algorithms

Each rule r in ules is a deductive rule which has the form: h(*r*) → g(*r*), in which h(*r*) and g(*r*) are the sets of facts. For example, the binary tree which has the left sub-tree containing only nodes with keys less than the right sub-tree is a binary search tree.

ules = {R1: {T: BINARY_TREE, ∀ p: node, p ∈ T, p.left.key < p.right,key}

→ {T: BINARY_SEARCH_TREE}

}

**lgo** *– set of algorithms in the course about Data Structures and Algorithms.*

lgo set is the set of algorithms in the course about Data Structures and Algorithms. It is categorized as: sort algorithms, search algorithms, algorithms on data structures (linked list, queue, stack, binary tree). This component stores the knowledge for the visualization of algorithms in practice.

lgo = {*InterchangeSort*, *BubbleSort*, *SelectionSort*,

*InsertionSort*, *QuickSort*, *MergeSort…*}

Each algorithm in the lgo-set is a frame which has the structure [5]:

*(Name, Content, Pseudo, Tasks, Visualization)*

In which:

- *Name*: The name of the algorithm.
- *Content*: The content of the algorithm.
- *Pseudo*: The pseudo code of the algorithm.
- *Tasks*: A list of tasks of the algorithm T = [*t*1*,…,tm*]

Each task represents an execution step in the algorithm.

- *Visualization*: The visualization method for the algorithm. It is a list of execution steps:

*Visualization* = [*s*1*,…, sk*]

Each *sj*in *s* is a result of the task in *Tasks*. Each *sj* has the structure *(text-sol, graph sol)*, which *text-sol* displays the result as text or string and *graph-sol* displays the result as graphic components such as: images, charts or graphs (1 ≤ *j* ≤ *k*).

Eg. 8: The structure of the frame representing Interchange sort algorithm:

Given an array A = [a1, …, a*n*]. Ascending sort the array A by Interchange sort algorithm.

| **Component** | **Content** |
| --- | --- |
| *Name* | Bubble sort |
| *Content* | The bubble sort is comparison-based algorithm in which each pair of adjacent elements is compared and the elements are swapped if they are not in order. The pass through the list is repeated until the list is sorted. |
| *Pseudo* | for (*i* = 0; *i* < *n* - 1; *i* ++)  for (*j* = *n* -1; *j* > *i*; *j* --)  if (a*j* - 1 > a*j*)  {  *t* = a*j -* 1;  a*j -* 1 = a*j*;  a*j* = *t*;  } |
| *Tasks* | *Task 1*:  for (*i* = 0; *i* < *n* - 1; *i* ++)  for (*j* = *n -* 1; *j* > *i*; *j* --)  *Task 2:*  if (a*j* - 1 > a*j*)  *Task 3:*  *t* = a*j* - 1;  a*j* - 1 = a*j*;  a*j* = *t*;  *Task 4:* |
| *Visualization* | Example: A = [5 8 -6], then the list of execution steps *s* = [*s*1 *s*2 *s*3 *s*4 *s*5 *s*6 *s*7 *s*8 *s*9 *s*10 *s*11] as follows:  Step *s*1:  text-sol: With *i* = 0  graph-sol: 5 8 -6  Step *s*2:  text-sol: With *i* = 0 and *j* = 2  graph-sol: 5 8 -6  Step *s*3:  text-sol: a1 = 8, a2 = -6, a*j* - 1 > a*j*.  graph-sol: 5 8 -6  Step *s*4:  text-sol: Swapping a*j* - 1 and a*j*  graph-sol: 5 -6 8  Step *s*5:  text-sol: With *i* = 0 and *j* = 1  graph-sol: 5 -6 8  Step *s*6:  text-sol: a0 = 5, a1 = -6, a*j* - 1 > a*j*  graph-sol: 5 -6 8  Step *s*7:  text-sol: Swapping a*j* - 1 and a*j*  graph-sol: -6 5 8  Step *s*8:  text-sol: With *i* = 1  graph-sol: -6 5 8  Step *s*9:  text-sol: With *i* = 1 and *j* = 2  graph-sol: -6 5 8  Step *s*10:  text-sol: a1 = 5, a2 = 8, a*j* - 1 < a*j*. Continue  graph-sol: -6 5 8  Step *s*11:  text-sol: *i* = 2 > *n* – 1. Finish the algorithm.  graph-sol: -6 5 8 |

Eg. 9: The visualization of Interchange sorting.

**Input:** List A = [4 -3 1 -9 2]

**Output:** Ascending sort of list A by Interchange sorting.

The visualization of Interchange sorting for this example is presented in: <https://www.youtube.com/watch?v=UJlezEP3AMI>

## References

1. H.V. Tran, M.H. Nguyen, D.V. Nguyen, D.H. Tran, “*Textbook and Workbook of Geometry at High school (4th edition)*”, Publisher of Education, Vietnam, 2014..
2. H.D. Nguyen, N.V. Do, V.T. Pham, K. Inoue, “Solving problems on a knowledge model of operators and application”, *International Journal of Digital Enterprise Technology (IJDET)*, 1(1/2), pp. 37–59, 2018.
3. Q. Vu, D.H. Doan et al. “*Textbook and Workbook of Physic at middle school (9th edition)*”, Publisher of Education, Vietnam, 2014.
4. V.N. Do, H.D. Nguyen, “Reducing model of COKB about Operators Knowledge and Solving problems about Operators”, *New Trends in Computational Collective Intelligence*, D. Camacho et al. (Eds.), SCI 572, pp. 39-49, Springer, 2015.
5. T.T. Le, S.T. Luu, H.D. Nguyen, N.V. Do, “Knowledge representation method for designing an Intelligent Tutoring System in Learning of courses about Algorithms”, Proceedings of 2019 25th Asia-Pacific Conference on Communications (APCC 2019), pp. 310-315, Ho Chi Minh, Vietnam, Nov. 2019.
6. T. Cormen, C. Leiserson, R. Rivest, C. Stein, *Introduction to Algorithms (3rd edition)*, MIT Press (2009).
